# Supplementary material for: Do Digital Orientations Enhance Environmental Sustainability Performance in Chinese Listed Firms? The Moderating Role of Intellectual Capital
Source: Research Square preprint supplement (doi:10.21203/rs.3.rs-7037088/v1), 2025-09-18
Supplement: Supplementary file 1 [file 43e297c1e4d79046e9140ede.docx]

**Appendices**

**
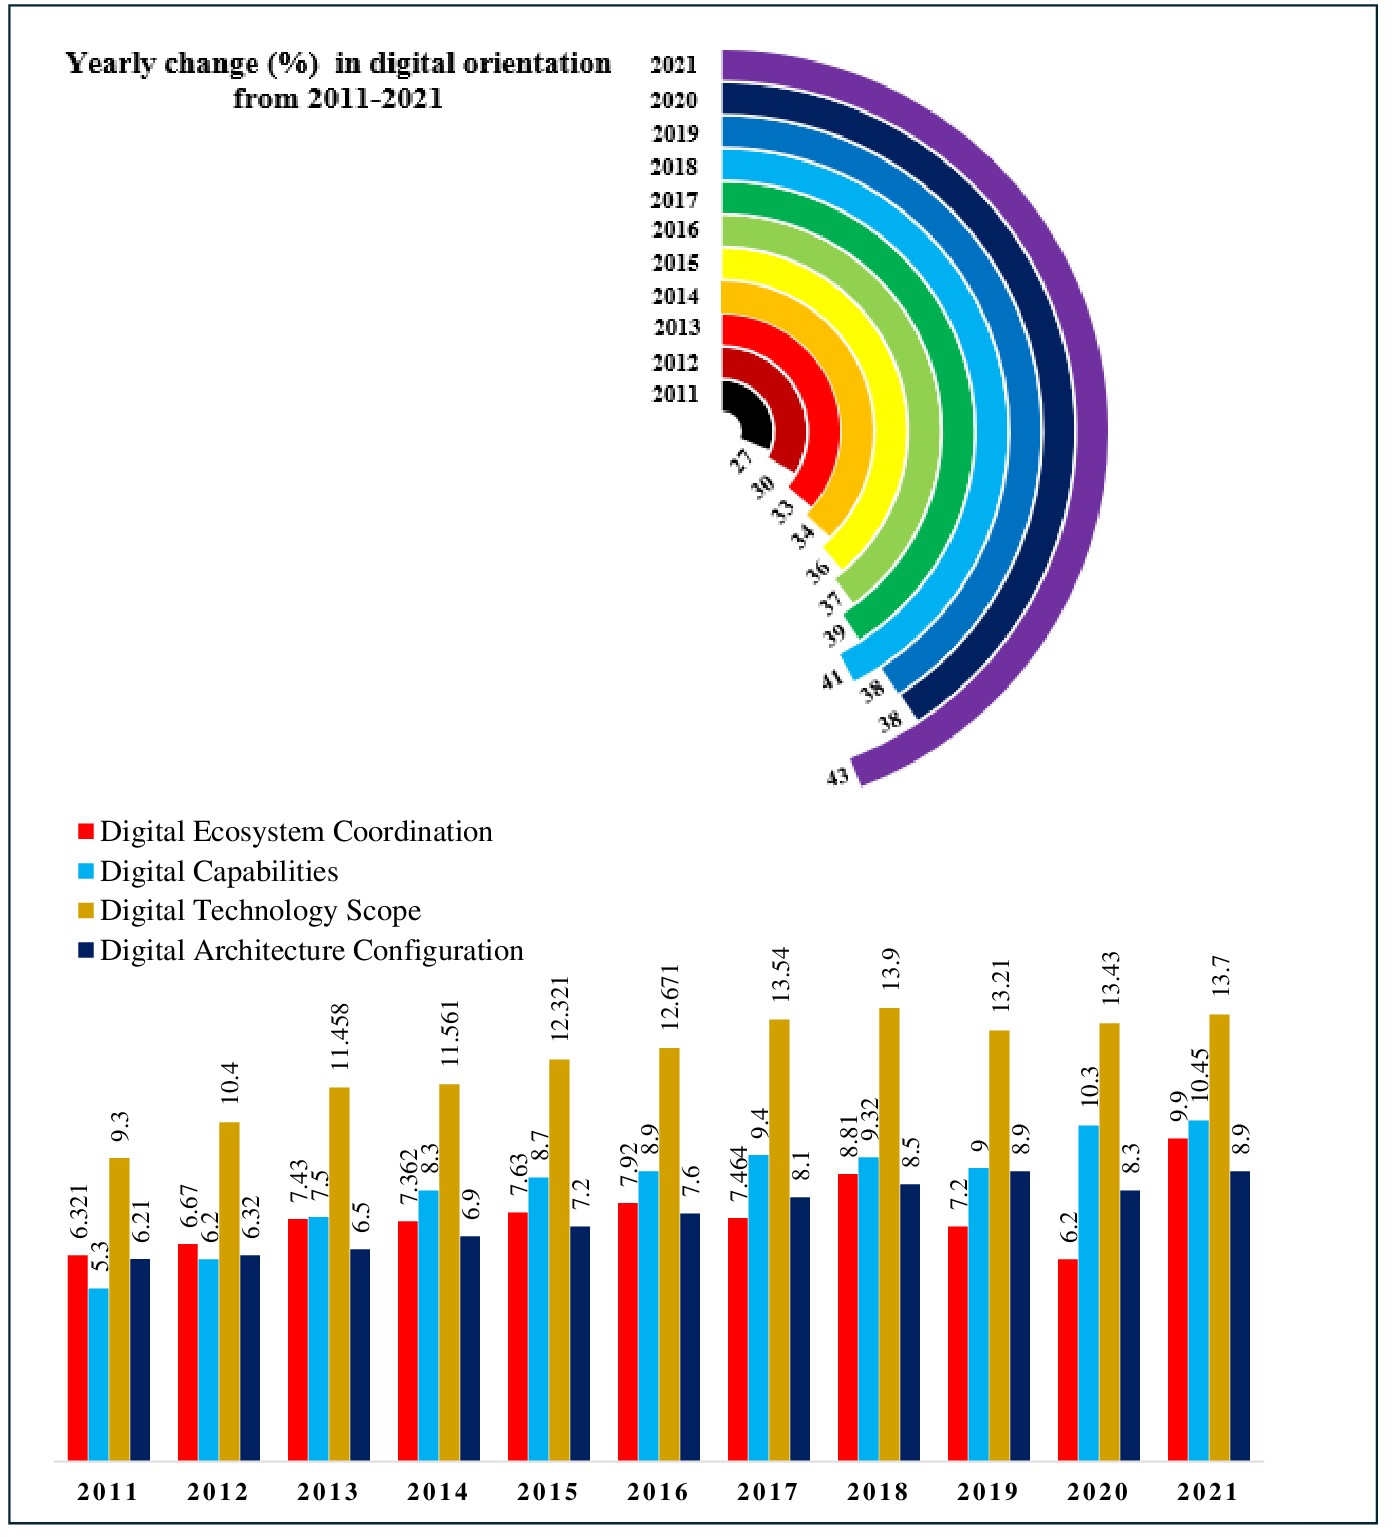
**

# **Appendix 1 .** Yearly change in digital orientation dimensions

**Appendix 2** Value-added intellectual capital (VAIC) measurement

| Value-added intellectual capital | VAIC | VAIC = HCE + SCE + CEE |
| --- | --- | --- |
| Value added | VA | VA= Operating profit + Salaries and wages + Depreciation + Amortization. |
| Human capital efficiency | HCE | HCE = VA/HC  Human capital (HC)= Total salaries and wages. |
| Structural capital efficiency | SCE | SCE = SC/VA  Structural capital (SC) = VA - HC. |
| Capital employed efficiency | CEE | CEE = VA/CE  Capital employed (CE) = Total assets - Current liabilities. |
